# Supplementary material for: Unpacking Collaborative Care for Depression: Examining Two Essential Tasks for Implementation
Source: Atypon-hosted journal article supplement (doi:10.1176/appi.ps.201400577), 2015-11-16

**Table.** Regression results of two key tasks as predictors of depression outcomes among patients treated in a collaborative care model

| VARIABLES                                          | ≥1 follow-up contact within 4 weeks |                          | ≥1 psychiatric consultation between weeks 8 and 12 |                          |
|----------------------------------------------------|-------------------------------------|--------------------------|----------------------------------------------------|--------------------------|
|                                                    | Odds Ratio                          | Hazard Ratio             | Odds Ratio                                         | Hazard Ratio             |
| ≥1 (vs. 0) follow-up within 4 weeks                | 1.63***<br>(1.23 - 2.17)            | 2.06***<br>(1.67 - 2.54) |                                                    |                          |
| ≥1 (vs. 0) psychiatric consultation within 8 weeks |                                     |                          | 1.44***<br>(1.13 - 1.84)                           | 0.99<br>(0.81 - 1.21)    |
| Female gender: female (vs. male)                   | 0.94<br>(0.82 - 1.09)               | 0.96<br>(0.85 - 1.08)    | 0.95<br>(0.79 - 1.13)                              | 0.91<br>(0.77 - 1.09)    |
| Patient age (ref. 18-29): 30-39                    | 0.82*<br>(0.66 - 1.02)              | 0.86**<br>(0.76 - 0.98)  | 0.81*<br>(0.64 - 1.03)                             | 0.81***<br>(0.71 - 0.93) |
| 40-49                                              | 0.75***<br>(0.64 - 0.87)            | 0.79***<br>(0.70 - 0.90) | 0.70***<br>(0.56 - 0.89)                           | 0.69***<br>(0.55 - 0.88) |
| 50-59                                              | 0.76*<br>(0.57 - 1.01)              | 0.80***<br>(0.69 - 0.94) | 0.75<br>(0.51 - 1.11)                              | 0.74***<br>(0.59 - 0.93) |
| 60 or older                                        | 0.77**<br>(0.61 - 0.97)             | 0.92<br>(0.74 - 1.13)    | 0.75<br>(0.53 - 1.06)                              | 0.92<br>(0.69 - 1.24)    |
| Co-morbid behavioral conditions:                   | 0.79***                             | 0.80***                  | 0.94                                               | 0.94                     |
| Anxiety disorder                                   | (0.71 - 0.88)                       | (0.70 - 0.91)            | (0.79 - 1.12)                                      | (0.86 - 1.04)            |
| Bipolar disorder                                   | 1.10<br>(0.95 - 1.28)               | 1.04<br>(0.93 - 1.16)    | 1.08<br>(0.85 - 1.38)                              | 1.06<br>(0.90 - 1.26)    |
| Cognitive disorder                                 | 1.09<br>(0.77 - 1.53)               | 1.00<br>(0.84 - 1.20)    | 0.96<br>(0.71 - 1.31)                              | 0.80<br>(0.62 - 1.04)    |
| Psychotic disorder                                 | 0.68<br>(0.39 - 1.18)               | 0.77<br>(0.49 - 1.21)    | 0.67<br>(0.37 - 1.21)                              | 0.79<br>(0.46 - 1.37)    |
| PTSD                                               | 0.94<br>(0.68 - 1.30)               | 0.91<br>(0.75 - 1.10)    | 0.99<br>(0.67 - 1.47)                              | 0.93<br>(0.70 - 1.22)    |
| Substance use disorder                             | 1.13*<br>(1.00 - 1.29)              | 1.10*<br>(1.00 - 1.21)   | 1.02<br>(0.87 - 1.19)                              | 0.95<br>(0.80 - 1.14)    |
| Suicide ideation                                   | 0.78***<br>(0.69 - 0.89)            | 0.83***<br>(0.76 - 0.90) | 0.83***<br>(0.74 - 0.93)                           | 0.82***<br>(0.75 - 0.89) |
| Baseline PHQ-9 score (ref.10-14):                  | 0.46***                             | 0.56***                  | 0.65***                                            | 0.69***                  |
| 15-19                                              | (0.38 - 0.55)                       | (0.48 - 0.65)            | (0.55 - 0.76)                                      | (0.58 - 0.83)            |
| 20 or higher                                       | 0.33***<br>(0.29 - 0.36)            | 0.42***<br>(0.40 - 0.45) | 0.51***<br>(0.46 - 0.57)                           | 0.58***<br>(0.50 - 0.68) |
| Patient eligibility category (ref. DL):            | 2.66***<br>(2.33 - 3.04)            | 1.94***<br>(1.73 - 2.17) | 2.18***<br>(1.50 - 3.18)                           | 2.07***<br>(1.52 - 2.82) |
| Low-income older adults                            | 1.60***<br>(1.22 - 2.10)            | 1.27**<br>(1.06 - 1.53)  | 1.59**<br>(1.05 - 2.40)                            | 1.28*<br>(1.00 - 1.65)   |
| Uninsured                                          | 1.54***<br>(1.20 - 1.97)            | 1.37***<br>(1.19 - 1.59) | 1.72***<br>(1.18 - 2.50)                           | 1.77***<br>(1.32 - 2.39) |
| Veterans                                           | 1.60***<br>(1.18 - 2.17)            | 1.51***<br>(1.16 - 1.97) | 1.89***<br>(1.40 - 2.54)                           | 1.75***<br>(1.46 - 2.10) |
| Family members of veterans                         | 0.91<br>(0.77 - 1.08)               | 0.89<br>(0.69 - 1.14)    | 0.79*<br>(0.62 - 1.00)                             | 0.72**<br>(0.52 - 0.98)  |

DL=Disability Lifeline

\*\*\*p&lt;0.01, \*\*p&lt;0.05, \*p&lt;0.1

Estimated odds ratios were based on logistic regressions of achieving clinically significant improvement in depression in 6 months; estimated hazard ratios were based on Cox proportional hazard models of times to improvement in depression.

All models controlled for MHIP implementation site fixed effects, results for which are not shown.

**Figure.** Kaplan-Meier survival curve for time to first clinically significant improvement in depression by psychiatric consultation between weeks 8 and 12 among patients not achieving improvement by week 8, extending follow-up to 48 weeks

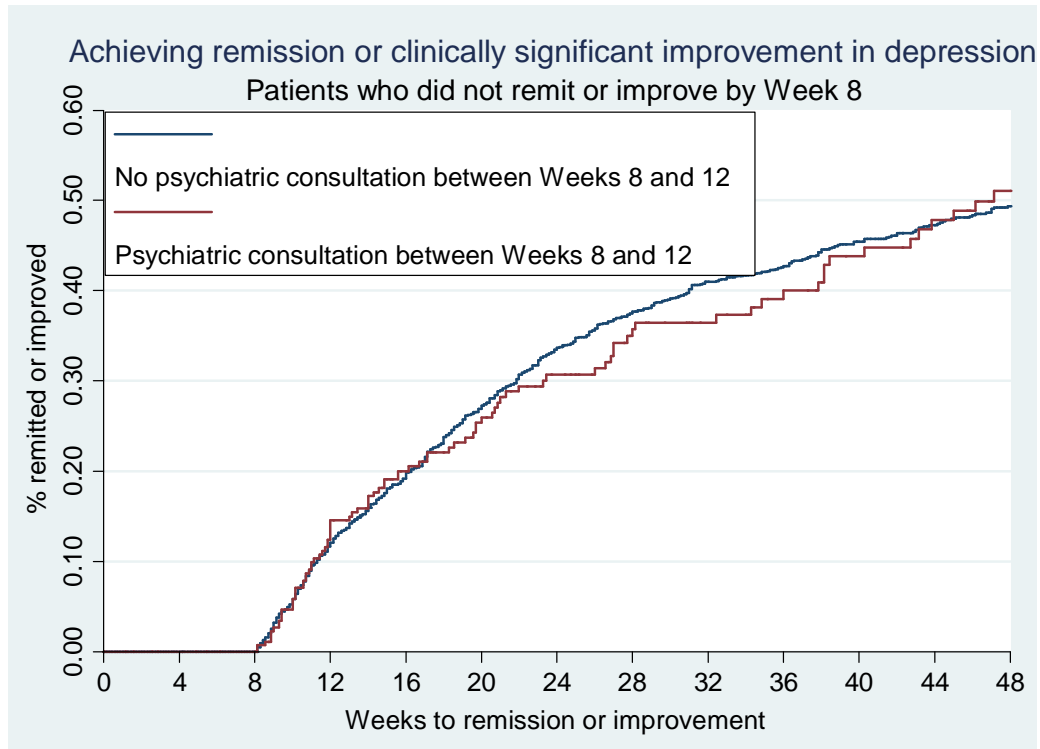

Supplement: appi.ps.201400577.ds001.pdf [file appi.ps.201400577.ds001.pdf]
